# Supplementary material
Source: publisher figshare collection journal article supplement (https://frontiersin.figshare.com/ndownloader/files/14726531)
Supplement: Supplementary file 1 [file 14726531]

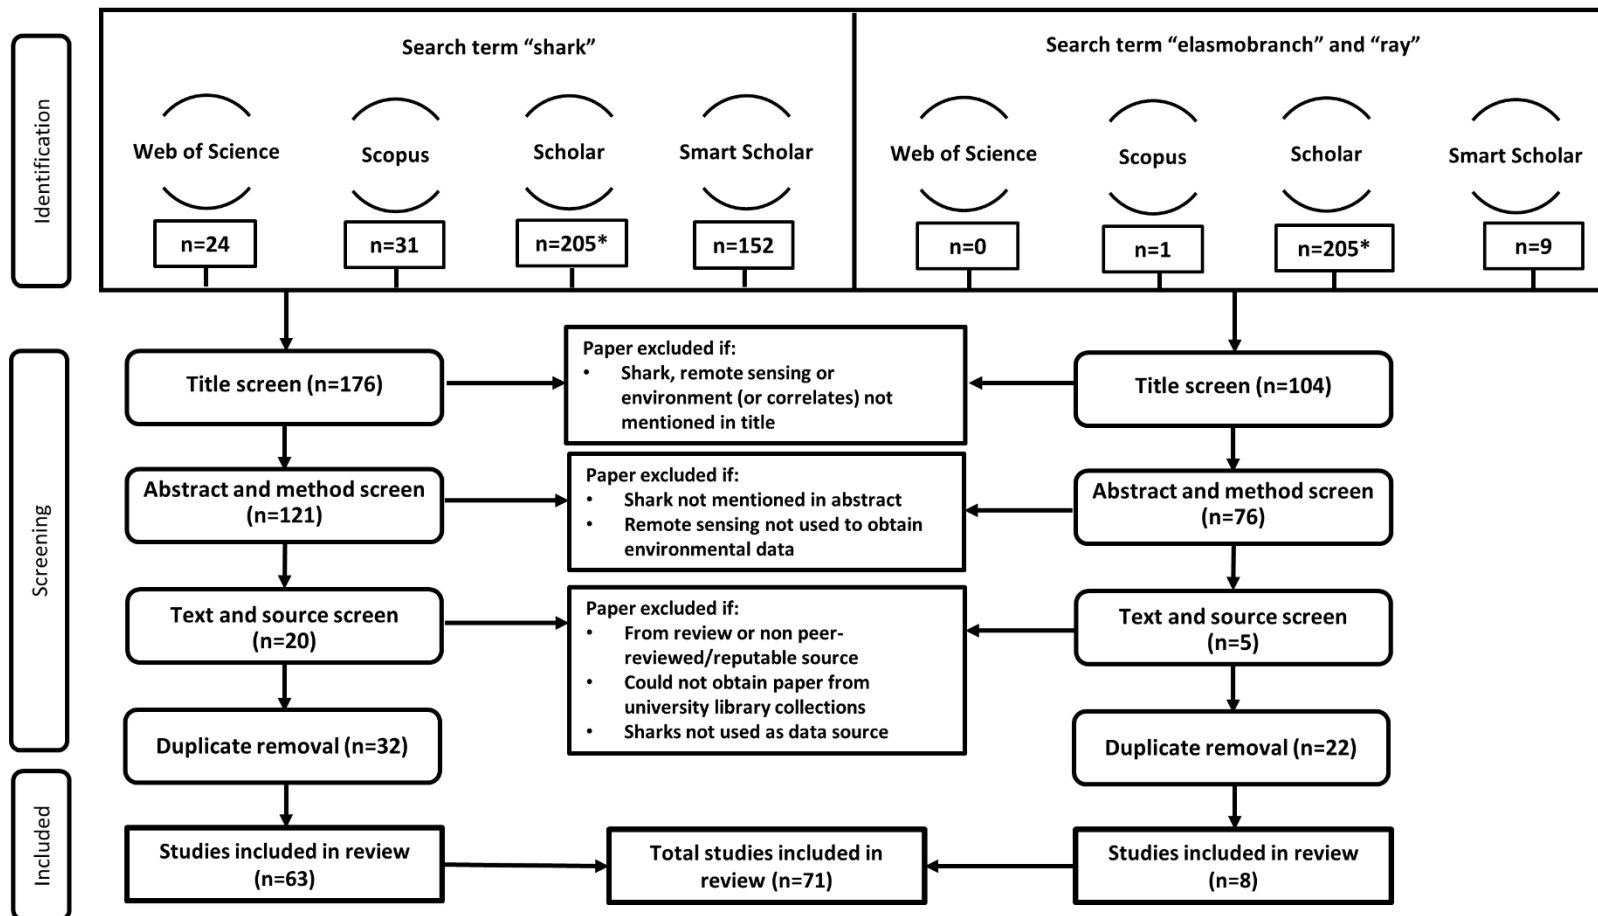

**SUPPLEMENTARY FIGURE S1** | Flow diagram of the methodology for article selection in the systematic review process, adapted from Moher et al. (2015). Numbers obtained by each search are provided. \*Due to the large number of results the first 205 (top 1%) papers were taken for Scholar searches.

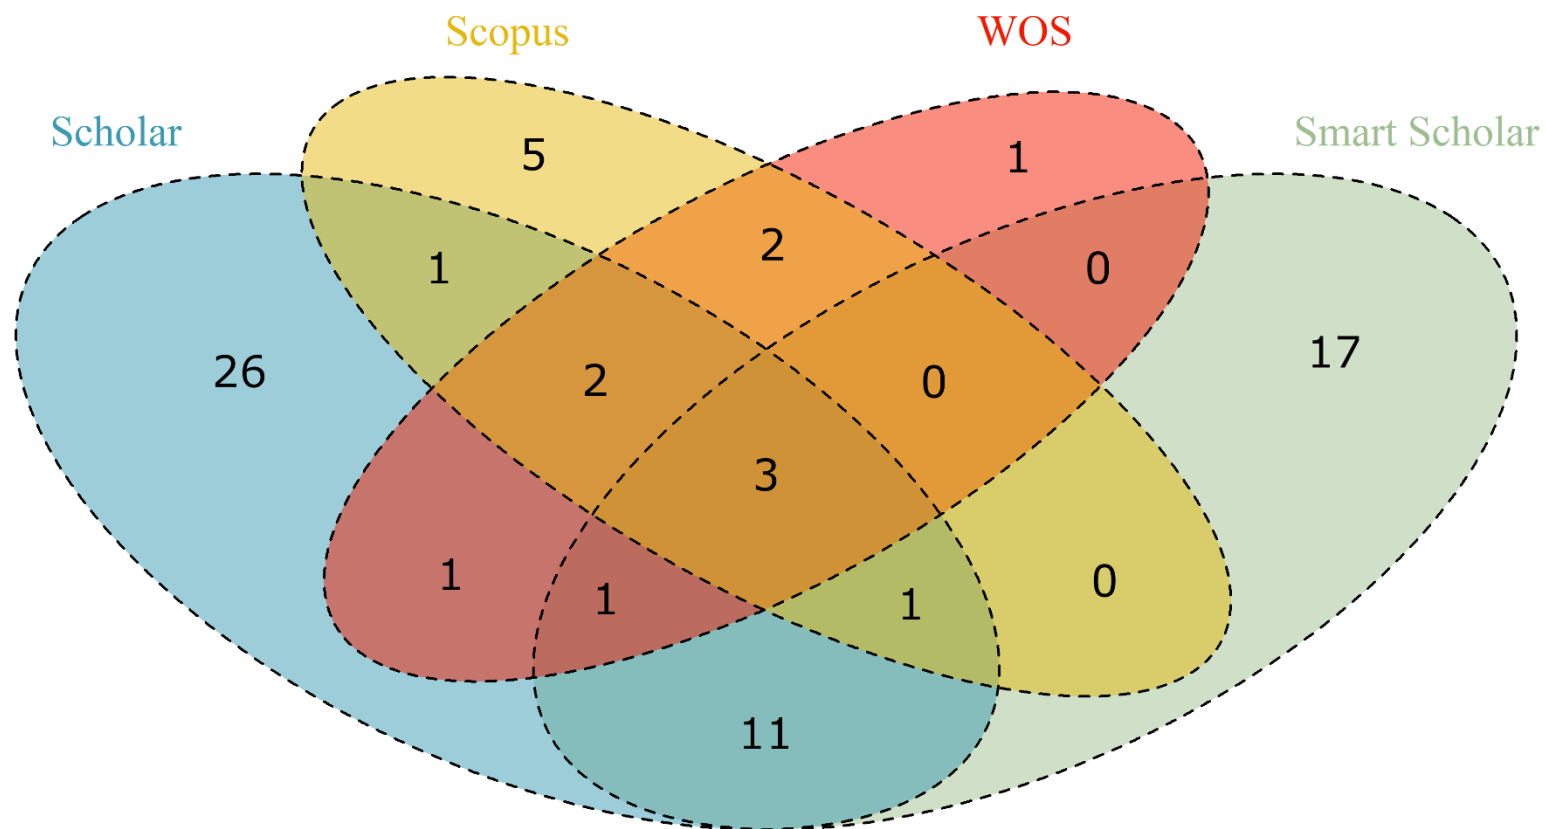

**SUPPLEMENTARY FIGURE S2** | Venn diagram depicting the four search engines used for the literature review, the numbers of articles found, and the overlap between search engines.

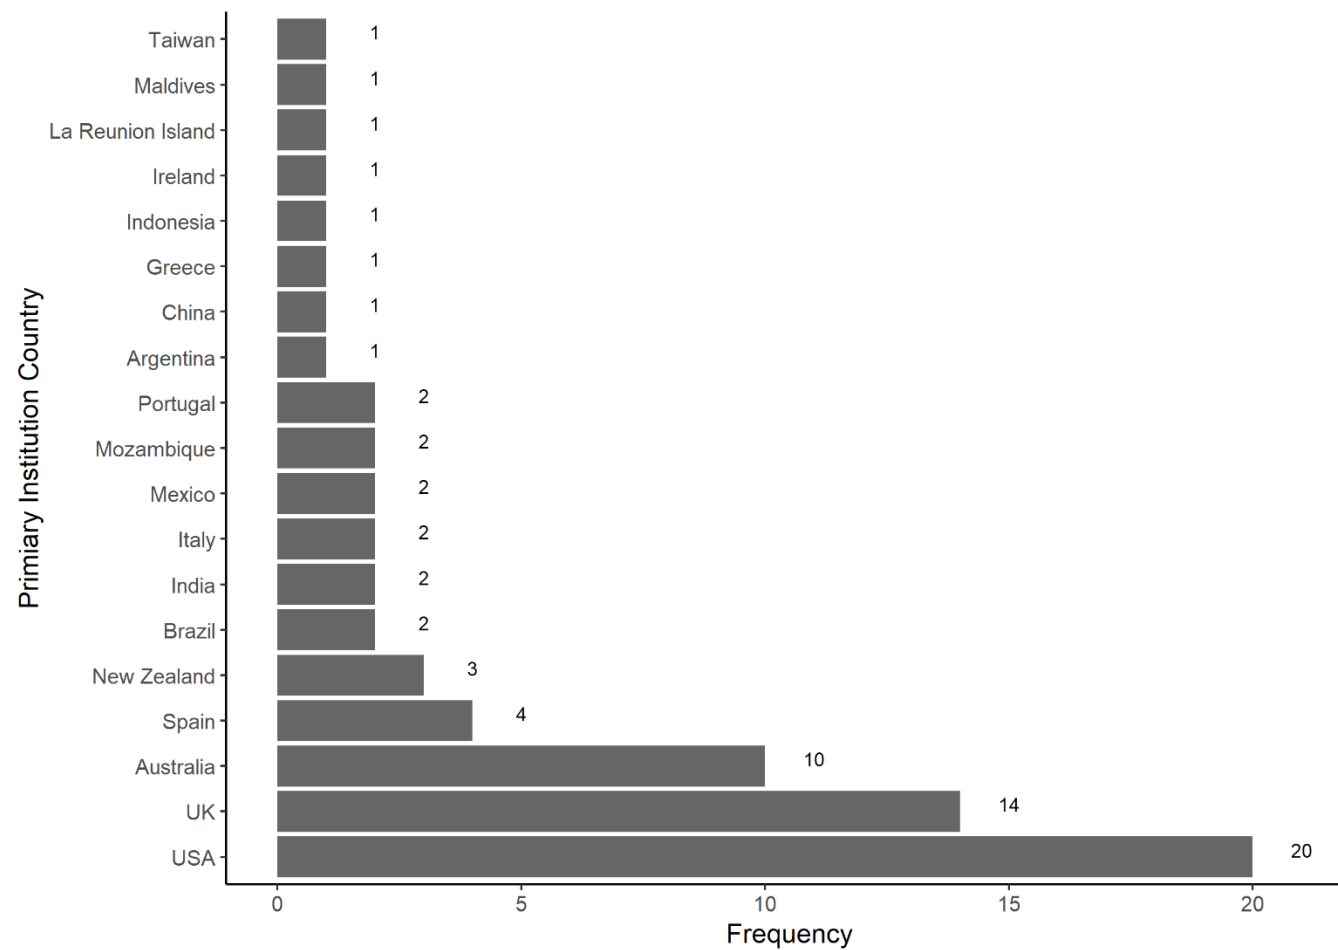

**SUPPLEMENTARY FIGURE S3** / Frequency of articles by country based on primary institution

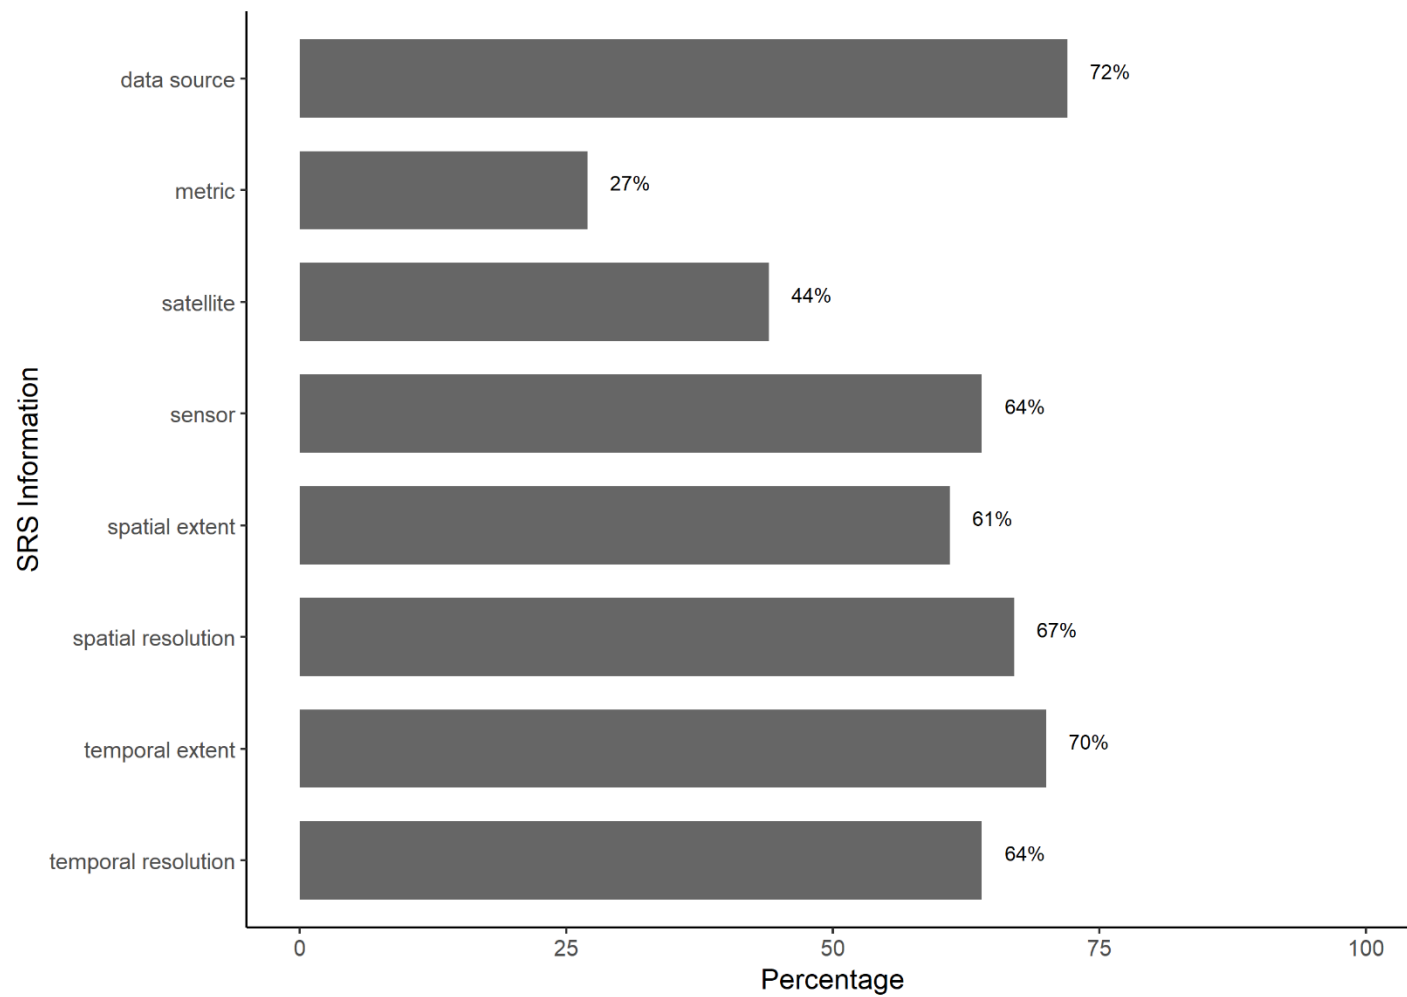

**SUPPLEMENTARY FIGURE S4** | Proportion of studies that report SRS source information

**SUPPLEMENTARY TABLE S1** | Specific search terms used for each search engine.

| <b>Search Engine</b>             | <b>Search Terms</b>                                                                                                                                                                                                                                                |
|----------------------------------|--------------------------------------------------------------------------------------------------------------------------------------------------------------------------------------------------------------------------------------------------------------------|
| Google Scholar                   | shark (or elasmobranch AND ray) AND remote sensing<br>AND (movement OR habitat OR ecology OR<br>environment*)                                                                                                                                                      |
| Google Scholar: Smart<br>Scholar | insubject:shark (or elasmobranch AND ray) AND remote<br>sensing intitle:shark (or elasmobranch AND ray) OR<br>remote sensing                                                                                                                                       |
| Scopus                           | shark (or elasmobranch AND ray) AND remote sensing<br>AND (movement OR habitat OR ecology OR<br>environment*)                                                                                                                                                      |
| Web of Science                   | shark (or elasmobranch AND ray) remote sensing<br>movement<br>OR<br>shark (or elasmobranch AND ray) remote sensing habitat<br>OR<br>shark (or elasmobranch AND ray) remote sensing ecology<br>OR<br>shark (or elasmobranch AND ray) remote sensing<br>environment* |

**SUPPLEMENTARY TABLE S2** | Metadata used to characterize remote sensing for elasmobranch ecology, conservation and management studies in the database.

| <b>Category</b>             | <b>Definition</b>                                                                                                                                                                        |
|-----------------------------|------------------------------------------------------------------------------------------------------------------------------------------------------------------------------------------|
| Article type                | Type of article (e.g., journal, book chapter)                                                                                                                                            |
| Environmental variables     | Environmental variables obtained by SRS used in the article                                                                                                                              |
| Elasmobranch data           | How elasmobranch data was collected (e.g., tagging technologies, survey data)                                                                                                            |
| Primary institution country | Institution country affiliated with the primary author                                                                                                                                   |
| Repeat                      | Was an article unique to a specific search engine or found in multiple search engines                                                                                                    |
| Satellite                   | Satellite platform used to collect the environmental variable(s) used in the article                                                                                                     |
| Search engine               | Search engine used to obtain the article                                                                                                                                                 |
| Sensor                      | Satellite sensor used to obtain environmental variable(s) used in the article                                                                                                            |
| Spatial coverage            | Area on the globe covered by the satellite sensor                                                                                                                                        |
| Spatial resolution          | Pixel size of the satellite sensor                                                                                                                                                       |
| SRS information             | Presence of information provided in the article on the data source, metric, sensor, satellite, temporal extent and resolution, and spatial extent and resolution of the SRS dataset used |
| Study application           | Theme of research applications of the article                                                                                                                                            |
| Study location              | GPS of study site(s) in the article                                                                                                                                                      |
| Taxonomic Order             | Order of the elasmobranch species in the study                                                                                                                                           |
| Temporal coverage           | Date range of data available from the satellite sensor                                                                                                                                   |
| Temporal resolution         | Time elapsed between observations of the same point on the Earth's surface for the satellite sensor                                                                                      |
| Year published              | Year of publication                                                                                                                                                                      |

**SUPPLEMENTARY TABLE S3** | List of common acronyms of satellites and sensors

| <b>Acronym</b> | <b>Full Name</b>                                  | <b>Acronym</b> | <b>Full Name</b>                                   |
|----------------|---------------------------------------------------|----------------|----------------------------------------------------|
| AATSR          | Advanced Along-Track Scanning Radiometer          | NSCAT          | NASA Scatterometer                                 |
| ABI            | Advanced Baseline Imager                          | OCI            | Ocean Color Instrument                             |
| ADEOS          | Advanced Earth Observing Satellite                | OCM            | Ocean Color Monitor                                |
| AHI            | Advanced Himawari Imager                          | OCTS           | Ocean Color and Temperature Scanner                |
| AMSR           | Advanced Microwave Scanning Radiometer            | OLCI           | Ocean Land Colour Instrument                       |
| ASCAT          | Advanced Scatterometer                            | POES           | Polar Orbiting Operational Environmental Satellite |
| ATSR           | Along Track Scanning Radiometer                   | QuikSCAT       | Quick Scatterometer                                |
| AVHRR          | Advanced Very High Resolution Radiometer          | RocSat         | Republic of China Satellite                        |
| CZCS           | Coastal Zone Color Scanner                        | SAC-D          | Scientific Application Satellite-D                 |
| DMSP           | Defense Meteorological Satellite Program          | SAR            | Synthetic Aperture Radar                           |
| ENVISAT        | Environmental Satellite                           | SeaWiFS        | Sea Viewing Wide Field Of View Sensor              |
| ERS            | European Remote Sensing                           | SEVIRI         | Spinning Enhanced Visible and InfraRed Imager      |
| GCOM-C         | Global Change Observation Mission - Climate       | SGLI           | Second-Generation Global Imager                    |
| GCOM-W1        | Global Change Observation Mission - Water         | SLSTR          | Sea and Land Surface Temperature Radiometer        |
| GOES           | Geostationary Operational Environmental Satellite | SMOS           | Soil Moisture Ocean Salinity                       |
| IASI           | Infrared Atmospheric Sounding Interferometer      | SNPP           | Suomi National Polar Orbiting Partnership          |
| IRS-P4         | Indian Remote Sensing Satellite-P4                | SSM/I          | Special Sensor Microwave Imager                    |
| MERIS          | Medium Resolution Imaging Spectrometer            | TMI            | TRMM Microwave Imager                              |
| METOP          | Meteorological Operational Satellite              | TRMM           | Tropical Rainfall Measuring Mission                |
| MIRAS          | Multi Color Infra Red Alerting Sensor             | VIIRS          | Visible Infrared Imaging Radiometer Suite          |
| MODIS          | Moderate Resolution Imaging Spectroradiometer     | WINDSAT        | Wind Microwave Radiometer                          |

**SUPPLEMENTARY TABLE S4** | Glossary

| Glossary            |                                                                                                     |
|---------------------|-----------------------------------------------------------------------------------------------------|
| Data repository     | Platform used to obtain environmental data from a data source.                                      |
| Data source         | Institution providing the environmental data                                                        |
| Temporal coverage   | Date range of data available from the satellite sensor                                              |
| Temporal resolution | Time elapsed between observations of the same point on the Earth’s surface for the satellite sensor |
| Spatial coverage    | Area on the globe covered by the satellite sensor                                                   |
| Spatial resolution  | Pixel size of the satellite sensor                                                                  |



**SUPPLEMENTARY TABLE S5** | Details of the final articles selected for the systematic review.

| <b>Title</b>                                                                                                                                                                                              | <b>Reference</b>            | <b>Source</b>                         | <b>Source Type</b> | <b>Search Engine</b>                |
|-----------------------------------------------------------------------------------------------------------------------------------------------------------------------------------------------------------|-----------------------------|---------------------------------------|--------------------|-------------------------------------|
| Spatial patterns of distribution and relative abundance of coastal shark species in the Galapagos Marine Reserve                                                                                          | Acuña-Marrero et al. (2018) | Marine Ecology Progress Series        | Journal article    | Smart scholar                       |
| Dynamics of whale shark occurrence at their fringe oceanic habitat                                                                                                                                        | Afonso, et al. (2014)       | PLOS One                              | Journal article    | Scholar                             |
| From monsoons to mantas: seasonal distribution of <i>Manta alfredi</i> in the Maldives                                                                                                                    | Anderson et al. (2011)      | Fisheries Oceanography                | Journal article    | Scholar                             |
| Environmental effects on swordfish and blue shark catch rates in the US North Pacific longline fishery                                                                                                    | Bigelow et al. (1999)       | Fisheries Oceanography                | Journal article    | Scopus; WOS; Scholar; Smart Scholar |
| Distribution, ecology, and status of the white shark, <i>Carcharodon carcharias</i> , in the Mediterranean Sea                                                                                            | Boldrocchiet al. (2017)     | Reviews in Fish Biology and Fisheries | Journal article    | Smart scholar                       |
| Movement patterns, habitat preferences, and fisheries biology of the common thresher shark ( <i>Alopias vulpinus</i> ) in the Southern California Bight                                                   | Cartamil (2009)             | PhD Thesis                            | UC San Diego       | Scholar                             |
| Spatial predictions of blue shark ( <i>Prionace glauca</i> ) catch rate and catch probability of juveniles in the Southwest Atlantic                                                                      | Carvalho et al. (2011)      | ICES Journal of Marine Science        | Journal article    | Scholar; Smart Scholar              |
| First record of bigeye thresher shark ( <i>Alopias superciliosus</i> Lowe, 1841) and new record of thresher shark [ <i>Alopias vulpinus</i> (Bonnaterre, 1788)](Chondrichthyes, Alopiidae) from Argentina | Cuevas & García (2016)      | Journal of Applied Ichthyology        | Journal article    | Smart scholar                       |
| Eyes in the sky: linking satellite oceanography and biotelemetry to explore habitat selection by basking sharks                                                                                           | Curtis et al. (2014)        | Animal Biotelemetry                   | Journal article    | Scopus                              |

|                                                                                                                                                                                          |                              |                                                                        |                        |                        |
|------------------------------------------------------------------------------------------------------------------------------------------------------------------------------------------|------------------------------|------------------------------------------------------------------------|------------------------|------------------------|
| Environmental effects on blue shark ( <i>Prionace glauca</i> ) and oilfish ( <i>Ruvettus pretiosus</i> ) distribution based on fishery-dependent data from the eastern Mediterranean Sea | Damalas & Megalofonou (2010) | Journal of the Marine Biological Association of the United Kingdom     | Journal article        | Smart scholar          |
| The Northeastern Pacific White Shark Shared Offshore Foraging area (SOFA)                                                                                                                | Domeier et al. (2012)        | Global Perspectives on the Biology and Life History of the White Shark | Book chapter           | Scholar; Smart Scholar |
| Regional population connectivity, oceanic habitat, and return migration revealed by satellite tagging of white sharks, <i>Carcharodon carcharias</i> , at New Zealand aggregation sites  | Duffy et al. (2012)          | Global Perspectives on the Biology and Life History of the White Shark | Book chapter           | Scholar                |
| Quantifying shark distribution patterns and species-habitat associations: implications of marine park zoning                                                                             | Espinoza et al. (2014)       | PLOS One                                                               | Journal article        | Scholar; Smart Scholar |
| Movement, depth distribution and survival of spinetail devilrays ( <i>Mobula japanica</i> ) tagged and released from purse-seine catches in New Zealand                                  | Francis & Jones (2017)       | Aquatic Conservation: Marine and Freshwater Ecosystems                 | Journal article        | Scholar                |
| Spatial patterning of <i>Manta birostris</i> in United States east coast offshore habitat                                                                                                | Freedman & Roy (2012)        | Applied Geography                                                      | Journal article        | Scholar                |
| Transatlantic migration and deep mid-ocean diving by basking shark                                                                                                                       | Gore et al. (2008)           | Biology Letters                                                        | Journal article        | Scholar; Smart Scholar |
| Habitat suitability and environmental factors affecting whale shark ( <i>Rhincodon typus</i> ) aggregations in the Mexican Caribbean                                                     | Hacohen-Domené et al. (2015) | Environmental Biology of Fishes                                        | Journal article        | Scholar                |
| Spatial and behavioral ecology of the sand tiger shark <i>Carcharias taurus</i> in the north-western Atlantic                                                                            | Haulsee (2017)               | PhD Thesis                                                             | University of Delaware | Smart scholar          |
| Tiger shark ( <i>Galeocerdo cuvier</i> ) movement patterns and habitat use determined by satellite tagging in eastern Australian waters                                                  | Holmes et al. (2014)         | Marine Biology                                                         | Journal article        | Scholar                |
| Satellite tracking of juvenile whale sharks, <i>Rhincodon typus</i> , in the Northwestern Pacific                                                                                        | Hsu et al. (2007)            | Fisheries Research                                                     | Journal article        | Scholar                |

|                                                                                                                                                                                                                             |                         |                                                             |                        |                                     |
|-----------------------------------------------------------------------------------------------------------------------------------------------------------------------------------------------------------------------------|-------------------------|-------------------------------------------------------------|------------------------|-------------------------------------|
| Environmental context explains Lévy and Brownian movement patterns of marine predators                                                                                                                                      | Humphries et al. (2010) | Nature                                                      | Journal article        | Scholar                             |
| A comparison between functional networks and artificial neural networks for the prediction of fishing catches                                                                                                               | Iglesias et al. (2004)  | Neural Computing and Applications                           | Journal article        | Scopus                              |
| When giants turn up: sighting trends, environmental influences and habitat use of the manta ray <i>Manta alfredi</i> at a coral reef                                                                                        | Jaine et al. (2012)     | PLOS One                                                    | Journal article        | Scholar                             |
| Development and evaluation of species distribution models for five endangered elasmobranchs in southwestern Atlantic                                                                                                        | Klippel et al. (2016)   | Hydrobiologia                                               | Journal article        | WOS                                 |
| Whale shark habitat assessments in the northeastern Arabian Sea using satellite remote sensing                                                                                                                              | Kumari & Raman (2010)   | International Journal of Remote Sensing                     | Journal article        | Scopus; WOS; Scholar; Smart Scholar |
| Bycatch of myliobatid rays in the central Mediterranean Sea: the influence of spatiotemporal, environmental, and operational factors as determined by generalized additive modeling                                         | La Mesa et al. (2016)   | Marine and Coastal Fisheries                                | Journal article        | Scholar                             |
| Identification of large pelagic marine fish habitats and habitat utilization using 'pop-up' satellite archival tag and oceanic satellite remote sensing technologies and 'SODA' simple ocean data simulation model analyses | Laurs et al. (2016)     | 2006 IEEE US/EU Baltic International Symposium, BALTIC 2006 | Conference proceedings | Scopus                              |
| Repeated, long-distance migrations by a philopatric predator targeting highly contrasting ecosystems                                                                                                                        | Lea et al. (2015)       | Scientific Reports                                          | Journal article        | Scopus                              |
| Whale shark ( <i>Rhincodon typus</i> ) seasonal occurrence, abundance and demographic structure in the mid-equatorial Atlantic Ocean                                                                                        | Macena et al. (2016)    | PLOS One                                                    | Journal article        | Smart scholar                       |

|                                                                                                                                                      |                               |                                  |                 |                        |
|------------------------------------------------------------------------------------------------------------------------------------------------------|-------------------------------|----------------------------------|-----------------|------------------------|
| Feeding habitat of the whale shark <i>Rhincodon typus</i> in the northern Gulf of Mexico determined using species distribution modelling             | McKinney et al. (2012)        | Marine Ecology Progress Series   | Journal article | Scholar; Smart Scholar |
| Modeling environmental, spatial, temporal, and operational effects on blue shark by-catches in the Mediterranean long-line fishery                   | Megalofonou et al. (2009)     | Journal of Applied Ichthyology   | Journal article | Smart scholar          |
| Frequent locations of oceanic fronts as an indicator of pelagic diversity: application to marine protected areas and renewables                      | Miller & Christodoulou (2014) | Marine Policy                    | Journal article | Scopus; WOS            |
| Basking sharks and oceanographic fronts: quantifying associations in the north-east Atlantic                                                         | Miller et al. (2015)          | Functional Ecology               | Journal article | Scopus; WOS; Scholar   |
| Quantifying the impact of environmental variables upon catch per unit effort of the blue shark <i>Prionace glauca</i> in the western English Channel | Mitchell et al. (2012)        | Journal of Fish Biology          | Journal article | Scholar; Smart Scholar |
| Sexual segregation of pelagic sharks and the potential threat from fisheries                                                                         | Mucientes et al. (2009)       | Biology Letters                  | Journal article | Scholar                |
| Re-creating missing population baselines for Pacific reef sharks                                                                                     | Nadon et al. (2012)           | Conservation Biology             | Journal article | Scholar                |
| White shark offshore habitat: a behavioral and environmental characterization of the eastern Pacific shared offshore foraging area                   | Nasby-Lucas et al. (2009)     | PLOS One                         | Journal article | Scholar; Smart Scholar |
| Standardized CPUE of blue shark in Indonesian tuna longline fishery estimated from scientific observer data, for the period 2005–2016.               | Novianto et al. (2017)        | IOTC report                      | Report          | Smart scholar          |
| Optimisation of fishing predictions by means of artificial neural networks, ANFIS, functional networks and remote sensing images                     | Nuno et al. (2005)            | Expert Systems with Applications | Journal article | Scopus; Scholar        |
| Predicting occurrence of juvenile shark habitat to improve conservation planning                                                                     | Oh et al. (2017)              | Conservation Biology             | Journal article | Smart scholar          |

|                                                                                                                                                                         |                              |                                                    |                 |                                |
|-------------------------------------------------------------------------------------------------------------------------------------------------------------------------|------------------------------|----------------------------------------------------|-----------------|--------------------------------|
| First results from satellite-linked archival tagging of porbeagle shark, <i>Lamna nasus</i> : area fidelity, wider-scale movements and plasticity in diel depth changes | Pade et al. (2009)           | Journal of Experimental Marine Biology and Ecology | Journal article | Smart scholar                  |
| Modelling sensitive elasmobranch habitats                                                                                                                               | Pennino et al. (2013)        | Journal of Sea Research                            | Journal article | Scholar; Smart Scholar         |
| A basking shark ( <i>Cetorhinus maximus</i> ) tracked by satellite together with simultaneous remote sensing                                                            | Priede (1984)                | Fisheries Research                                 | Journal article | Scholar; Smart Scholar         |
| A basking shark ( <i>Cetorhinus maximus</i> ) tracked by satellite together with simultaneous remote sensing II: new analysis reveals orientation to a thermal front    | Priede & Miller (2016)       | Fisheries Research                                 | Journal article | Scopus; Scholar; Smart Scholar |
| Short-term movements and diving behaviour of satellite-tracked blue sharks <i>Prionace glauca</i> in the north-eastern Atlantic Ocean                                   | Queiroz et al. (2010)        | Marine Ecology Progress Series                     | Journal article | Scholar                        |
| Spatial dynamics and expanded vertical niche of blue sharks in oceanographic fronts reveal habitat targets for conservation                                             | Queiroz et al. (2012)        | PLOS One                                           | Journal article | Scholar                        |
| Oceanic adults, coastal juveniles: tracking the habitat use of whale sharks off the Pacific coast of Mexico                                                             | Ramírez-Macías et al. (2017) | Peer J                                             | Journal article | Scholar                        |
| Movement, distribution and marine reserve use by an endangered migratory giant                                                                                          | Reynolds et al. (2017)       | Diversity and Distributions                        | Journal article | Scopus; WOS                    |
| Trends in sightings and environmental influences on a coastal aggregation of manta rays and whale sharks                                                                | Rohner et al. (2013)         | Marine Ecology Progress Series                     | Journal article | WOS; Scholar; Smart Scholar    |
| Satellite tagging highlights the importance of productive Mozambican coastal waters to the ecology and conservation of whale sharks                                     | Rohner et al. (2018)         | Peer J                                             | Journal article | Scholar                        |

|                                                                                                                     |                        |                                                                   |                        |                                     |
|---------------------------------------------------------------------------------------------------------------------|------------------------|-------------------------------------------------------------------|------------------------|-------------------------------------|
| Winter migration and diving behaviour of porbeagle shark, <i>Lamna nasus</i> , in the Northeast Atlantic            | Saunders et al. (2010) | ICES Journal of Marine Science                                    | Journal article        | Smart scholar                       |
| Characterisation of blue shark ( <i>Prionace glauca</i> ) hotspots in the South-West Indian Ocean                   | Selles et al. (2014)   | 10th IOTC Working Party on Ecosystem and Bycatch, Yokohama, Japan | Conference proceedings | Smart scholar                       |
| Predicting current and future global distributions of whale sharks                                                  | Sequeira et al. (2014) | Global Change Biology                                             | Journal article        | Scopus                              |
| Ocean-scale prediction of whale shark distribution                                                                  | Sequeira et al. (2012) | Diversity and Distributions                                       | Journal article        | Scholar; Smart Scholar              |
| Seasonal movements and behaviour of basking sharks from archival tagging: no evidence of winter hibernation         | Sims et al. (2003)     | Marine Ecology Progress Series                                    | Journal article        | Scholar                             |
| Habitat-specific normal and reverse diel vertical migration in the plankton-feeding basking shark                   | Sims et al. (2005)     | Journal of Animal Ecology                                         | Journal article        | Scholar                             |
| Selective foraging behaviour of basking sharks on zooplankton in a small-scale front                                | Sims et al. (1998)     | Nature                                                            | Journal article        | Scholar; Smart Scholar              |
| Encounter success of free-ranging marine predator movements across a dynamic prey landscape                         | Sims et al. (2006)     | Proceedings of the Royal Society of London B: Biological Sciences | Journal article        | Scholar                             |
| Oceanographic and atmospheric phenomena influence the abundance of whale sharks at Ningaloo Reef, Western Australia | Sleeman et al. (2010)  | Journal of Experimental Marine Biology and Ecology                | Journal article        | Scopus; WOS; Scholar; Smart Scholar |
| Biophysical correlates of relative abundances of marine megafauna at Ningaloo Reef, Western Australia               | Sleeman et al. (2007)  | Marine and Freshwater Research                                    | Journal article        | Scholar                             |
| To go or not to go with the flow: environmental influences on whale shark movement patterns                         | Sleeman et al. (2010)  | Journal of Experimental Marine Biology and Ecology                | Journal article        | Smart scholar                       |
| Fishery forecast using OCM chlorophyll concentration and AVHRR SST: validation results off Gujarat coast, India     | Solanki et al. (2003)  | International Journal of Remote Sensing                           | Journal article        | Scholar                             |

|                                                                                                                                                          |                          |                                |                 |                                     |
|----------------------------------------------------------------------------------------------------------------------------------------------------------|--------------------------|--------------------------------|-----------------|-------------------------------------|
| Seasonal space-use estimates of basking sharks in relation to protection and political-economic zones in the North-east Atlantic                         | Southall et al. (2006)   | Biological Conservation        | Journal article | Scholar                             |
| Essential pelagic habitat of juvenile blue shark ( <i>Prionace glauca</i> ) inferred from telemetry data                                                 | Vandeperre et al. (2016) | Limnology and Oceanography     | Journal article | Smart scholar                       |
| Long-term satellite tracking reveals region-specific movements of a large pelagic predator, the shortfin mako shark, in the western North Atlantic Ocean | Vaudo et al. (2017)      | Journal of Applied Ecology     | Journal article | Smart scholar                       |
| A short note on the horizontal and vertical movements of a whale shark, <i>Rhincodon typus</i> , tracked by satellite telemetry in the South China Sea   | Wang et al. (2012)       | Integrative Zoology            | Journal article | Smart scholar                       |
| Unique sequence of events triggers manta ray feeding frenzy in the southern Great Barrier Reef, Australia                                                | Weeks et al. (2017)      | Remote Sensing                 | Journal article | Scholar                             |
| Migration of an upper trophic level predator, the salmon shark <i>Lamna ditropis</i> , between distant ecoregions                                        | Weng et al. (2008)       | Marine Ecology Progress Series | Journal article | Scopus; WOS; Scholar; Smart Scholar |
| Whither the whale shark wanders: Tools and methods for modelling whale shark movement                                                                    | Wickham (2011)           | PhD Thesis                     | PhD thesis      | Smart scholar                       |
| Basking sharks ( <i>Cetorhinus maximus</i> ) schooling in the southern Gulf of Maine                                                                     | Wilson (2004)            | Fisheries Oceanography         | Journal article | Scholar                             |
| Accuracy and precision of archival tag data: a multiple-tagging study conducted on a whale shark ( <i>Rhincodon typus</i> ) in the Indian Ocean          | Wilson et al. (2007)     | Fisheries Oceanography         | Journal article | WOS; Scholar                        |
